# Supplementary material for: The SOD1-mediated ALS phenotype shows a decoupling between age of symptom onset and disease duration
Source: Springer Nature journal article supplement (doi:10.1038/s41467-022-34620-y), 2022-11-12
Supplement: MOESM1 [file 41467_2022_34620_MOESM1_ESM.pdf]

The *SOD1*-mediated ALS phenotype shows a decoupling between age of symptom onset and disease duration

Supplementary information

## Table of Contents

|                            |   |
|----------------------------|---|
| Supplementary figures..... | 2 |
|----------------------------|---|

## Supplementary figures

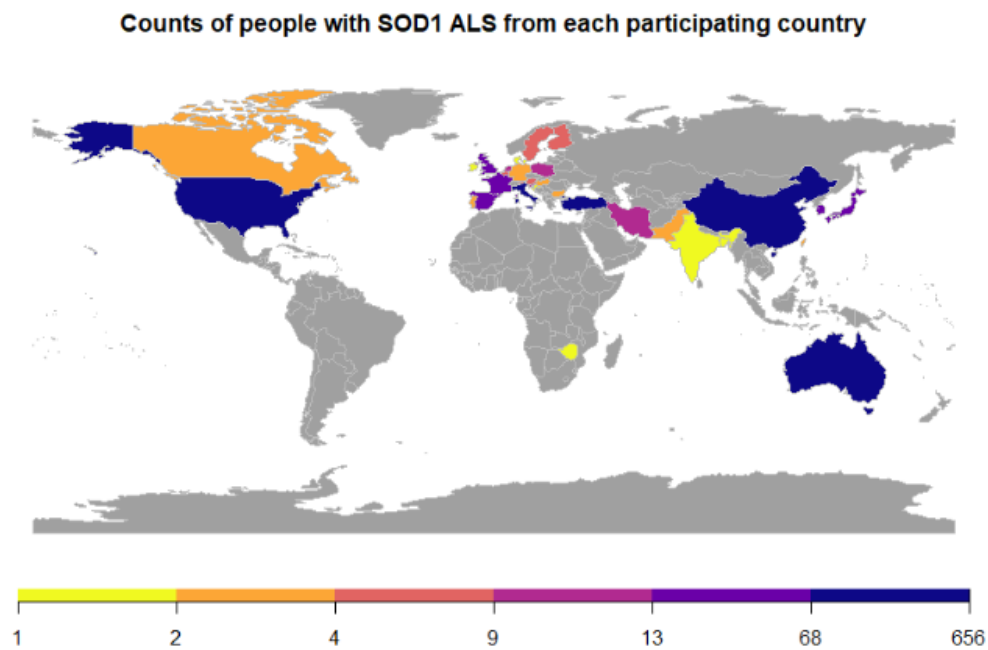

**Figure S1** World map showing the 31 countries in the cleaned dataset (n=1534). The numbers of people per country in the dataset are represented by sextiles.

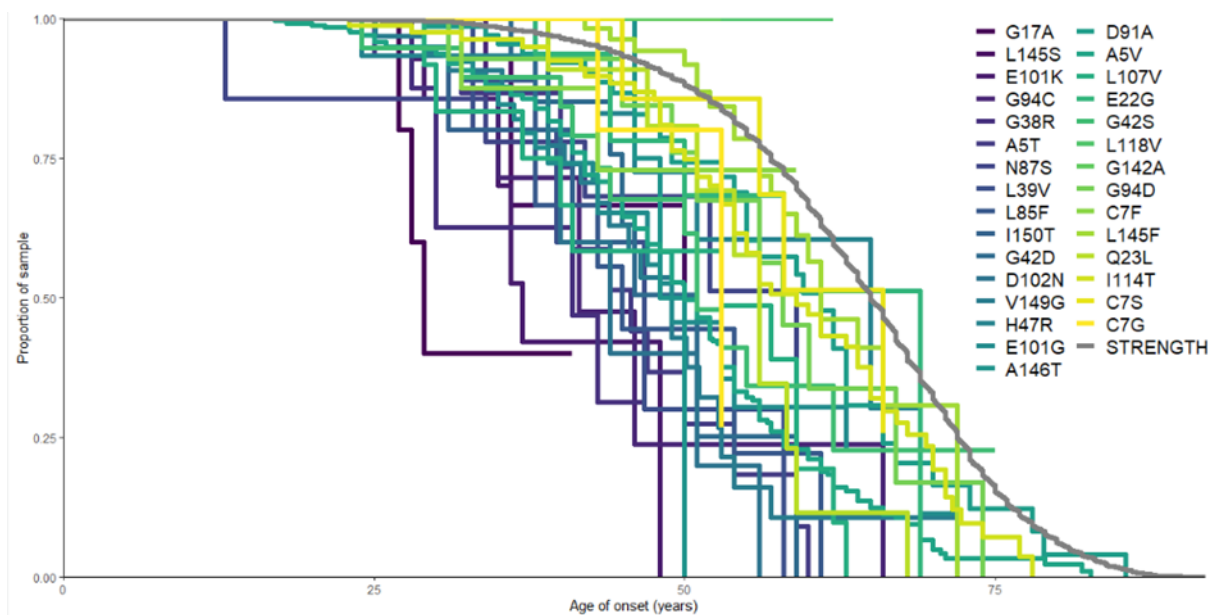

**Figure S2** Kaplan-Meier plot showing time to onset of disease in people with different SOD1 variants compared to the STRENGTH cohort.

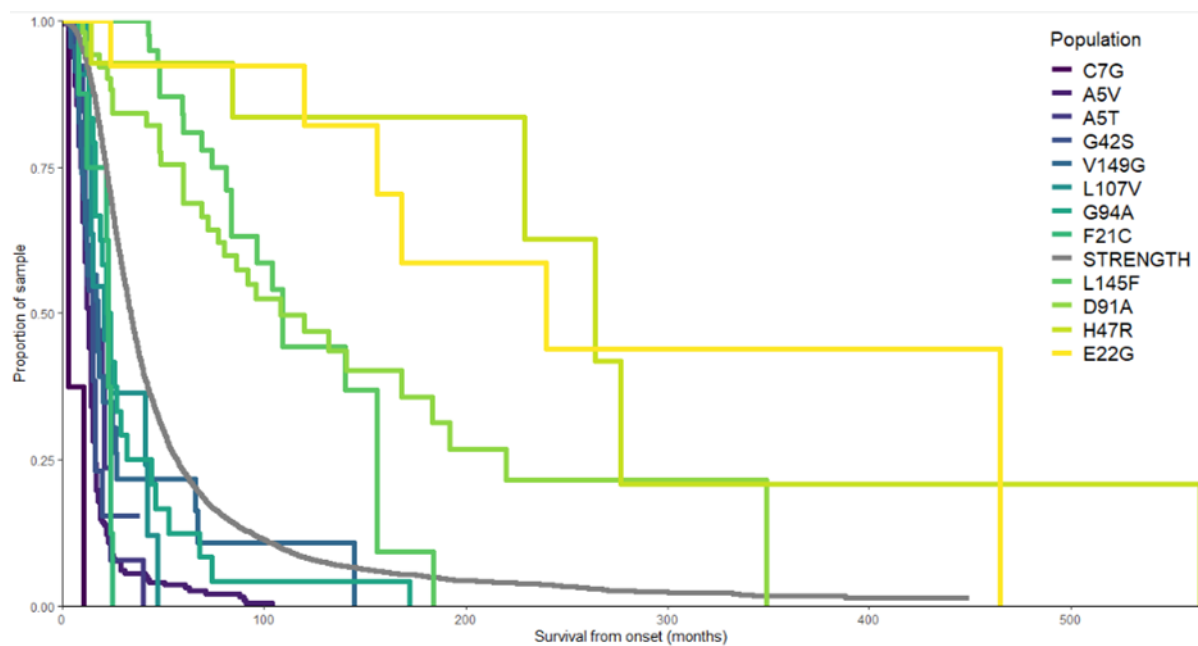

**Figure S3** Kaplan-Meier plot showing disease duration in people with different SOD1 variants compared to the STRENGTH cohort.

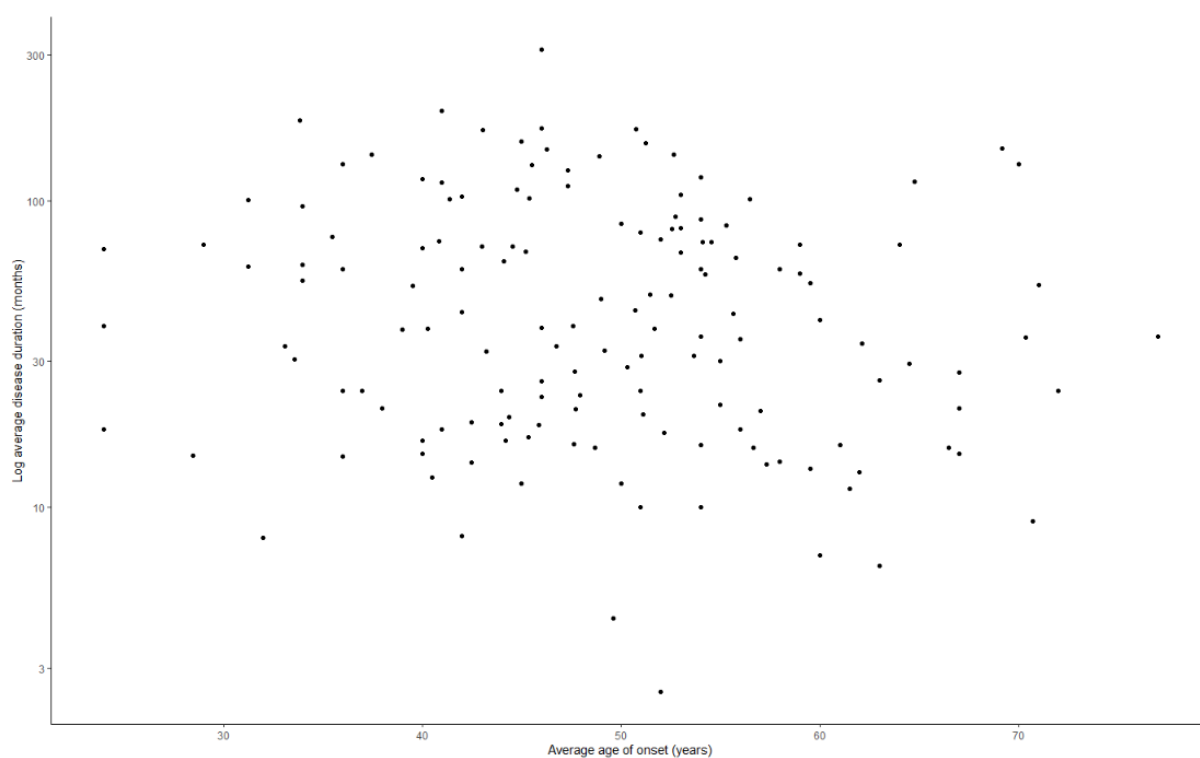

**Figure S4** Scatter plot of average age of onset and log average disease duration. Each dot represents a SOD1 variant.
